# Supplementary material
Source: publisher figshare collection journal article supplement (https://acs.figshare.com/ndownloader/files/6000279)
Supplement: Supplementary file 1 [file 6000279]

**SUPPLEMENTARY DATA**

for

Mode of interaction of the signal-transducing protein EIIA<sup>Glc</sup> with  
the maltose ABC transporter in the process of inducer exclusion

Steven Wuttge, Anke Licht, Mohammad Hadi Timachi, Enrica Bordignon, and

Erwin Schneider

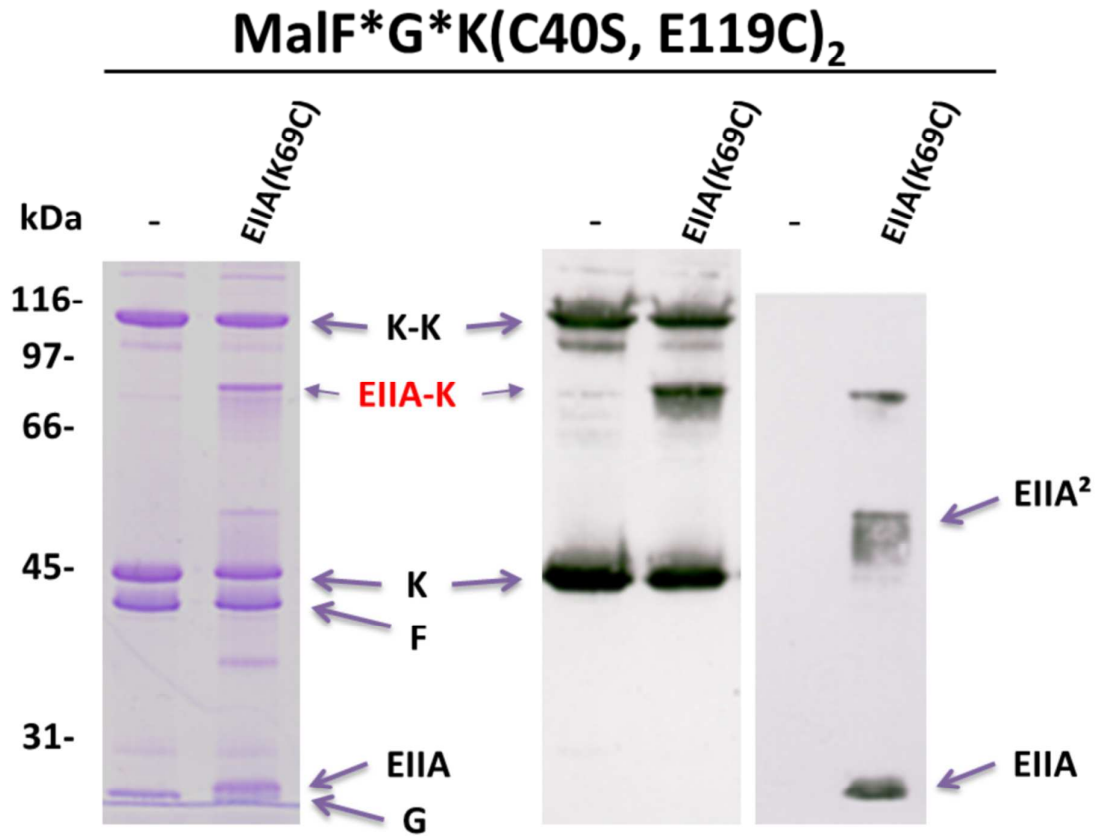

**Fig. S1. CuPhe-induced cross-linking of MalF\*G\*K(C40S, E119C)<sub>2</sub> with  $EIIA^{Glc}(K69C)$ .** Crosslinking was performed in the presence of CuPhe as described in 'Experimental procedures' and the products were analysed by SDS-PAGE (*left panel*) and immunoblots probed with anti-MalK antibodies (*center panel*) and anti- $EIIA^{Glc}$  antibodies (*right panel*).

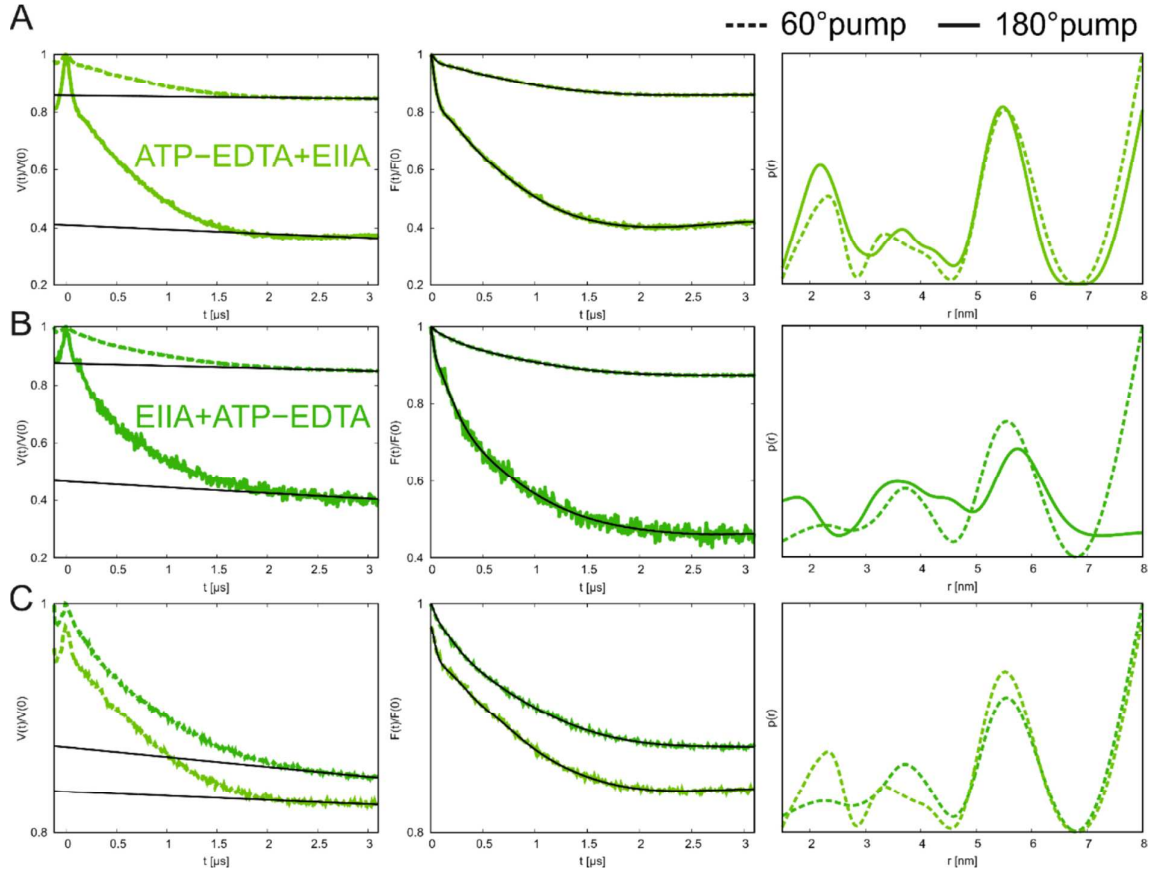

**Fig. S2. Ghost peak suppression in DEER traces.** Q-band DEER primary data  $[V(t)/V(0)]$  with fitted background (left), background-corrected DEER traces  $[F(t)/F(0)]$  with fitted distribution function (center) and corresponding distance distribution (*right*) calculated using DeerAnalysis2015 for the spin-labeled pair 17MalK/128MalK. Traces are shown for samples with EIIA<sup>Glc</sup> added before (dark green, as in Fig. 4B) or after (light green, as in Fig. 4C) ATP-EDTA. Traces were obtained using a  $\pi$  pulse in the pump frequency (panels A, B solid lines) as in Figs. 4 panels B-C or a  $\pi/3$  pulse (panels A, B dashed lines). The latter setup strongly decreases the modulation depth of the DEER traces and minimizes the artefacts exerted by the ghost peaks in a 4-spin system<sup>1,2</sup>. Negligible effects of ghost peak artefacts are present in the distance range 1.5-4 nm, which reports the opening and closing of the NBDs. (C) Comparison of the traces obtained with the  $\pi/3$  pulse for the samples pre- or post- incubated with EIIA<sup>Glc</sup>. The results are consistent with those presented in Fig. 4.

### **Supplementary References**

(1) von Hagens, T., Polyhach, Y., Sajid, M., Godt, A., and Jeschke, G. (2013) Suppression of ghost distances in multiple-spin double electron-electron resonance, *Phys Chem Chem Phys* 15,5854-5866.

(2) Valera, S., Ackermann, K., Pliotas, C., Huang, H., Naismith, J.H., and Bode, B.E. (2016) Accurate Extraction of Nanometer Distances in Multimers by Pulse EPR, *Chemistry* 22, 4700-4703.

**Table S1. Strains and plasmids used in this study**

| Strain/Plasmid                               | Relevant genotype                                                                                                                                                                                                                                                                                                    | Reference/Source           |
|----------------------------------------------|----------------------------------------------------------------------------------------------------------------------------------------------------------------------------------------------------------------------------------------------------------------------------------------------------------------------|----------------------------|
| <i>Strain</i>                                |                                                                                                                                                                                                                                                                                                                      |                            |
| <i>E. coli</i> JM109                         | e14 <sup>-</sup> ( <i>mcrA</i> ) <i>recA1</i> <i>endA1</i> <i>gyrA96</i><br><i>thi-1</i> <i>hsdR17</i> ( <i>rk<sup>-</sup></i> , <i>mk<sup>+</sup></i> ) <i>supE44</i><br><i>relA1</i> $\Delta$ ( <i>lac-proAB</i> ) F'[ <i>traD36</i><br><i>proAB<sup>+</sup></i> <i>lacI<sup>f</sup></i> <i>lacZ</i> $\Delta$ M15] | Stratagene (La Jolla, USA) |
| <i>E. coli</i> BL21(DE3) $\Delta$ <i>pts</i> | <i>hsdS</i> <i>gal</i> ( $\lambda$ <i>clts857</i> <i>ind1</i> S <i>am7</i><br><i>nin5</i> <i>lacUV-T7</i> <i>gene 1</i> )<br>$\Delta$ <i>pts43crr::kan<sup>R</sup></i>                                                                                                                                               | [22]                       |
| <i>Plasmid</i>                               |                                                                                                                                                                                                                                                                                                                      |                            |
| pAL66                                        | <i>malK</i> (C40S, C350M, C360M,<br>V17C, E128C), derivative of<br>pMG39                                                                                                                                                                                                                                             | [32]                       |
| pBB04                                        | <i>crr</i> on pET15b, Ap <sup>R</sup>                                                                                                                                                                                                                                                                                | [28]                       |
| pBB04(F88Q)                                  | <i>crr</i> (F88Q) derivative of pBB04                                                                                                                                                                                                                                                                                | [28]                       |
| pBB04(K130C)                                 | <i>crr</i> (K130C) derivative of pBB04                                                                                                                                                                                                                                                                               | Lab collection             |
| pBK02                                        | <i>malK</i> (C40S, Q122C), derivative<br>of pMM37                                                                                                                                                                                                                                                                    | Lab collection             |
| pBK04                                        | <i>malK</i> (C40S, R322C), derivative<br>of pMM37                                                                                                                                                                                                                                                                    | Lab collection             |
| pBK05                                        | <i>malK</i> (C40S, A320C), derivative<br>of pMM37                                                                                                                                                                                                                                                                    | Lab collection             |

|        |                                                                                                      |                              |
|--------|------------------------------------------------------------------------------------------------------|------------------------------|
| pCB6   | <i>malE</i> on pQE9, p <sub>T5</sub> , Ap <sup>R</sup>                                               | [39]                         |
| pET15b | p <sub>T7lac</sub> ; His <sub>6</sub> -coding sequence (5'), thrombin cleavage site, Ap <sup>R</sup> | Novagen (Bad Soden, Germany) |
| pHL04  | <i>crr</i> (P125C), derivative of pBB04                                                              | Lab collection               |
| pHL09  | <i>malK</i> (C40S, E119C), derivative of pMM37                                                       | Lab collection               |
| pMG39  | <i>malK</i> (C40S, C350M, C360M) on pSU19                                                            | Lab collection               |
| pMM34  | <i>malF</i> ( <i>cys</i> <sup>-</sup> ) <i>malG</i> ( <i>cys</i> <sup>-</sup> ) on pTZ18R            | Lab collection               |
| pMM37  | <i>malK796</i> (C40S) on pSU19                                                                       | [37]                         |
| pTZ18R | Phagemid, p <sub>tac</sub>                                                                           | GE Healthcare                |
| pWS02  | <i>crr</i> (K69C), derivative of pBB04                                                               | This study                   |
| pWS08  | <i>crr</i> (Δ1-16, P125C), derivative of pBB04                                                       | This study                   |
| pWS09  | <i>Crr</i> (E97C), derivative of pBB04                                                               | This study                   |
| pWS19  | <i>crr</i> (Δ1-16, K69C), derivative of pBB04                                                        | This study                   |
| pWS29  | <i>crr</i> (E160C), derivative of pBB04                                                              | This study                   |

**Table S2. C<sub>β</sub>- C<sub>β</sub> distances determined from the X-ray structure of the maltose transporter complexed with EIIA<sup>Glc</sup> (PDB code 4JBW).**

| Residues |                     | C <sub>β</sub> - C <sub>β</sub> distance (Å) |
|----------|---------------------|----------------------------------------------|
| MalK     | EIIA <sup>Glc</sup> |                                              |
| E119     | K69                 | 10.8                                         |
| E119     | E160                | 30.5                                         |
| Q122     | K69                 | 12.5                                         |
| Q122     | E97                 | 14.0                                         |
| A320     | P125                | 15.4                                         |
| R322     | P125                | 14.8                                         |

**Table S3. ATPase activities of maltose transporter variants.**

| Complex variant                    | ATPase activity <sup>a</sup><br>( $\mu\text{mol P}_i \text{ mg}^{-1} \cdot \text{min}^{-1}$ ) |
|------------------------------------|-----------------------------------------------------------------------------------------------|
| MalF*G*K(C40S) <sub>2</sub>        | 1.81 $\pm$ 0.22                                                                               |
| MalF*G*K(C40S, E119C) <sub>2</sub> | 1.72 $\pm$ 0.14                                                                               |
| MalF*G*K(C40S, Q122C) <sub>2</sub> | 1.46 $\pm$ 0.12                                                                               |
| MalF*G*K(C40S, A320C) <sub>2</sub> | 1.42 $\pm$ 0.09                                                                               |
| MalF*G*K(C40S, R322C) <sub>2</sub> | 1.52 $\pm$ 0.10                                                                               |

<sup>a</sup> ATPase activities of transport complexes reconstituted in proteoliposomes were measured in the presence of MalE/maltose as described in 'Experimental procedures'. The values are the mean of three independent trials with SD corrected for the activity in the absence of MalE/maltose which was below 10%. \* denotes cysless subunit.



**Table S4. Inhibition (%) of ATPase activities of maltose transporter mono-cys variants by mono-cys EIIA<sup>Glc</sup> mutants**

| complex variant                    | EIIA <sup>Glc</sup><br>(wt) | EIIA <sup>Glc</sup><br>(K69C) | EIIA <sup>Glc</sup><br>(E97C) | EIIA <sup>Glc</sup><br>(P125C) | EIIA <sup>Glc</sup><br>(E160C) |
|------------------------------------|-----------------------------|-------------------------------|-------------------------------|--------------------------------|--------------------------------|
| MalF*G*K(C40S) <sub>2</sub>        | 73 ± 12                     | 64 ± 8                        | 65 ± 7                        | 72 ± 8                         | 68 ± 7                         |
| MalF*G*K(C40S, E119C) <sub>2</sub> | 64 ± 9                      | 63 ± 6                        | 52 ± 9                        | 61 ± 8                         | 64 ± 4                         |
| MalF*G*K(C40S, Q122C) <sub>2</sub> | 59 ± 7                      | 54 ± 5                        | 67 ± 5                        | 56 ± 5                         | 55 ± 5                         |
| MalF*G*K(C40S, A320C) <sub>2</sub> | 14 ± 2                      | 12 ± 2                        | 11 ± 2                        | 12 ± 3                         | 11 ± 2                         |
| MalF*G*K(C40S, R322C) <sub>2</sub> | 0                           | 0                             | 0                             | 0                              | 0                              |

ATPase activities of the transporter variants in the absence of EIIA<sup>Glc</sup> (see Table S3) were set 100 %. Values are the mean of three independent trials with SD. nd, not determined. \*denotes cysless subunit.

**Table S5. ATPase activities of MalF\*G\*K(V17C, E128C) embedded in nanodiscs in the absence and presence of EIIA<sup>Glc</sup>**

| <b>Transporter complex</b>                 | <b>No addition</b> | <b>+ MalE/maltose</b> | <b>+ MalE/maltose/<br/>EIIA<sup>Glc</sup></b> | <b>+ MalE/maltose/<br/>EIIA<sup>Glc</sup>(F88Q)</b> |
|--------------------------------------------|--------------------|-----------------------|-----------------------------------------------|-----------------------------------------------------|
| MalF*G*K* <sub>2</sub>                     | 0.04 ± 0.02        | 3.31 ± 0.18           | 0.54 ± 0.02                                   | 3.44 ± 0.27                                         |
| MalF*G*K(V17C/E128C) <sub>2</sub> +<br>DTT | 0.04 ± 0.01        | 3.53 ± 0.19           | 0.59 ± 0.14                                   | 3.88 ± 0.14                                         |
| MalF*G*K(V17R1/E128R1) <sub>2</sub>        | 0.03 ± 0.01        | 3.18 ± 0.15           | 0.72 ± 0.09                                   | 3.37 ± 0.18                                         |

ATPase activities of purified complex variants in nanodiscs (0.5 μM) were measured in the absence or presence of MalE (5 μM) and maltose (10 μM). Nanodiscs were prepared as described in ‘Experimental procedures’. Data represent means of at least three independent experiments. \*denotes cys-less subunit, R1 denotes the spin-labeled side chain. Due to an internal cross-link the MalF\*G\*K(V17C/E128C)<sub>2</sub> complex was assayed in the presence of 1 mM DTT.
